# Supplementary material for: Single-cell transcriptome profiling of the human endometrium of patients with recurrent implantation failure
Source: Theranostics. 2022 Sep 6;12(15):6527–47. doi: 10.7150/thno.74053 (PMC9516226; doi:10.7150/thno.74053)
Supplement: Supplementary file 1 — Supplementary figures and tables. [file thnov12p6527s1.pdf]

## **Supplementary information**

### **Exosomes enrichment, characterization, purification and analysis**

After passage 3, hEECs were cultured to 80-90% confluence in complete medium (MEM containing 10% fetal bovine serum and 1% penicillin/streptomycin). Then, the complete medium was replaced with serum-free medium. Fifteen bottles of T75 cell culture flasks were used for each isolation, meaning exosomes from  $10 \times 10^6$  hEECs were isolated each time. Twenty-four hours later, the medium was collected, larger vesicles and debris were removed by centrifugations at  $3,000 \times g$  for 20 min, then filtration through 0.22  $\mu\text{m}$  pore filters (TPP Techno Plastic Products AG, Trasadingen, Switzerland). For ultracentrifugation (UC), the conditioned medium (CM) was centrifuged for 1 h at 110,000 g (Optima XPN-80 Ultracentrifuge, BECKMAN COULTER, Brea, California, United States) to pellet exosomes and washed with PBS by a centrifugation at 110,000 g subsequently. For the polyethylene glycol (PEG) precipitation method, PEG precipitation was performed at a final concentration of 10% PEG 6,000 (50% wt/vol; Merck Group, Darmstadt, Germany) and 75 mM NaCl. After incubation for at least 12 h at 4 °C, Exosomes were concentrated by centrifugation for 30min at 4,500 g. Exosome pellets were then resolved in PBS to a total volume of 30 mL and precipitated by UC for 1 h at 110,000 g and washed with PBS by centrifugation at 110,000 g subsequently. Then, exosomes were diluted in 500  $\mu\text{L}$  of PBS, each microlitre contained  $2 \times 10^4$  cell equivalent exosomes which yielded about 0.1  $\mu\text{g}/\mu\text{L}$  protein and an average of  $405 \pm 186$  particles/cell. Exosome pellets were resolved and stored at -80 °C until usage. For medium control the same amount of complete medium has been processed in the very same manner as for conditioned medium using the PEG method.

Transmission electron microscopy (TEM) was used to investigate the microstructure of EECs-exosomes. Briefly, formvar-coated TEM grids (copper, 150 hexagonal mesh, Science Services, Munich, Germany) were put on the top of a droplet of the respective exosome fraction and incubated for 10 min. Then, the grids were washed and incubated with ultrapure water. For contrast, the grids were incubated for 5min on droplets of uranylacetate-oxalate, followed by a 5-min incubation on droplets of a 1:9 dilution of 4% uranylacetate in 2% methylcellulose. After draining the methylcellulose from the grids using a filter paper and drying of the methylcellulose film as previously described, samples were imaged with a LEO912 transmission electron microscope (Carl Zeiss Microscopy, Oberkochen, Germany) and images were taken using an onaxis 2k CCD camera (TRS-STAR, Stutensee, Germany).

Nanoparticle tracking analyses were performed with the Nanosight platform (NanoSight LM10, Malvern Panalytical, Kassel, Germany) for exosomes characterization. As shown previously, 1:1,000 water-diluted samples were measured in duplicate. For iodixanol gradient separation, a discontinuous iodixanol gradient was prepared by diluting a stock solution of OptiPrep™ (60% w/v; STEMCELL Technologies, Vancouver, Canada) with 0.25 M sucrose/10 mM Tris, pH 7.5 to generate 50%, 20% and 10% w/v iodixanol solutions. exosomes obtained from equal amount of ADMSCs by UC or PEG were washed and resuspended in 3 mL of the aforementioned solution. With care, the discontinuous iodixanol gradient was generated by sequentially layering 3 mL each of 50%, 20% and 10% (w/v) iodixanol solutions. Three mL of resuspended CM was overlaid on the discontinuous iodixanol gradient and centrifuged for 12 h at 110,000 g. Fractions of 1.2 mL were collected from the top of the gradient. Each fraction (1 to 10) was diluted to 20 mL in PBS and recentrifuged at 110,000 g

for 2 h. The resulting pellets were resuspended in PBS and analyzed for particle concentration or exosomes markers. For UC and PEG combined with size-exclusion chromatography (SEC), the resuspended pellets from UC and PEG were loaded onto Exo-spin™ buffer columns (Cell Guidance Systems, Cambridge, UK) according to the manufacturer's instructions. The exosomes-containing fractions were pooled and concentrated using Amicon spin filters (Merck Group, Darmstadt, Germany).

**To review GEO accession GSE183837:**

Go to <https://www.ncbi.nlm.nih.gov/geo/query/acc.cgi?acc=GSE183837>

Enter token ypgnaguglboipin into the box

**Table S1 Antibodies for Flow Cytometry**

| Antibody                                         | Manufactory | Cat No. |
|--------------------------------------------------|-------------|---------|
| Brilliant violent (BV) 421 Anti-human CD45       | BioLegend   | 368522  |
| APC/Cyanine 7 (APC/Cy7) Anti-human HLA-DR        | BioLegend   | 307618  |
| Fluorescein isothiocyanate (FITC) Anti-human CD3 | BioLegend   | 317306  |
| BV605 Anti-human CD56                            | BioLegend   | 362538  |
| Phycoerythrin (PE) Anti-human CD4                | BioLegend   | 357404  |
| APC Anti-human CD8                               | BioLegend   | 344722  |
| APC Anti-human CXCR4                             | BioLegend   | 306510  |
| PE/Cy7 Anti-human ITGA1                          | BioLegend   | 328312  |
| PE/Cy7 Anti-human CD14                           | BioLegend   | 367112  |
| PE/Cy7 Anti-human CD15                           | BioLegend   | 301924  |
| PE Anti-human CD11B                              | BioLegend   | 393112  |
| FITC Anti-human CD1C                             | BioLegend   | 331518  |
| APC Anti-human Ki67                              | BioLegend   | 350514  |
| PE/Cy7 Anti-human CD94                           | BioLegend   | 305516  |
| BV605 Anti-human CD19                            | BioLegend   | 302244  |
| APC Anti-human CD117                             | BioLegend   | 375204  |

**Table S2 Gene primers for qRT-PCR**

| Name            | Sequence (5' -> 3')                                                     |
|-----------------|-------------------------------------------------------------------------|
| <i>ACTB</i>     | Forwards: GCCGACAGGATGCAGAAGGAGATCA<br>Reverse: AAGCATTTGCGGTGGACGATGGA |
| <i>APOD</i>     | Forwards: CTTGGGAAGTGCCCCAATCC<br>Reverse: TGCCGATGGCATAAACCAGG         |
| <i>APOE</i>     | Forwards: CTCAGGGGCCTCTAGAAAGA<br>Reverse: CAGCGCAGGTAATCCCAAAG         |
| <i>CXCL12</i>   | Forwards: TCAACACTCCAAACTGTGCCCTTC<br>Reverse: TCCACTTTAGCTTCGGGTCAATGC |
| <i>IL15</i>     | Forwards: CCATCCAGTGCTACTTGTGTTT<br>Reverse: TCACCCAGTTGGCTTCTGTTTTAGG  |
| <i>ATG5</i>     | Forwards: GCTTCGAGTGTGTGGTTTGG<br>Reverse: ACTTTGTCAGTTACCAACGTCA-      |
| <i>ATG7</i>     | Forwards: CAGTTTGCCCCTTTTAGTAGTGC<br>Reverse: CCAGCCGATACTCGTTCAGC      |
| <i>BECN1</i>    | Forwards: ATCTAAGGAGCTGCCGTTATAC<br>Reverse: CTCCTCAGAGTTAAACTGGGTT     |
| <i>MAP1LC3B</i> | Forwards: TTATTCGAGAGCAGCATCCAACC<br>Reverse: CCGTTCACCAACAGGAAGAAGG    |
| <i>mTOR</i>     | Forwards: GAGATACGCTGTCATCCCTTTA<br>Reverse: CTGTATTATTGACGGCATGCTC     |
| <i>MUC1</i>     | Forwards: TGCCGCCGAAAGAACTACG<br>Reverse: TGGGGTACTCGCTCATAGGAT         |
| <i>CK7</i>      | Forwards: TCCGCGAGGTCACCATTAAC<br>Reverse: GCTCTGTCAACTCCGTCTCAT        |
| <i>EpCAM</i>    | Forwards: AATCGTCAATGCCAGTGTACTT<br>Reverse: TCTCATCGCAGTCAGGATCATAA    |
| <i>ESR1</i>     | Forwards: CCCACTCAACAGCGTGTCTC<br>Reverse: CGTCGATTATCTGAATTTGGCCT      |
| <i>PAX8</i>     | Forwards: ATCCGGCCTGGAGTGATAGG<br>Reverse: TGGCGTTTGTAGTCCCCAATC        |

**Table S3 Gene list of of six functions**

| Age      | Sex<br>hormone<br>signaling | Immune<br>pathway | Cell<br>proliferation | Embryo<br>implantation | ECM<br>remodeling |
|----------|-----------------------------|-------------------|-----------------------|------------------------|-------------------|
| APOD     | F3                          | CD24              | S100A13               | CRABP2                 | COL6A1            |
| TSPO     | WFDC1                       | LGALS1            | IGF1                  | ALDH1A2                | ELN               |
| IL15     | ALDH1A2                     | HLA-C             | TSC22D1               | CST3                   | GSN               |
| GPX1     | KRT19                       | HLA-A             | PTN                   | FBLN1                  | COL6A2            |
| DCN      | CD24                        | CXCL13            | ALDH1A2               | RPL29                  | COL3A1            |
| SERPING1 | TSPO                        | CXCL12            | SFRP1                 | APOD                   | COL6A3            |
| SOD2     | C3                          | IL15              | CLEC11A               | SAT1                   | COL4A1            |
| FOS      | FOS                         | IL32              | F3                    | HAND2                  | COL7A1            |
| JUND     | CST3                        | C1R               | ECM1                  | RHOB                   | FN1               |
| JUN      | GPX1                        | C3                | CXCL13                | ID1                    | CD44              |
| GSN      | ANXA1                       | CEBPB             | SAT1                  | JUN                    | COL18A1           |
| COL3A1   | STAT3                       | B2M               | KLF4                  | KLF4                   | COL6A1            |
| STAT3    | SLIT3                       | IFI16             | PLA2G2A               | INSR                   | APP               |
| SOCS3    | JUND                        | GAL               | ANXA1                 | EGR1                   | CYR61             |
| SLC18A2  | JUN                         | NFKBIZ            | NFKBIA                | APOLD1                 | TNC               |
|          | PDGFRB                      | ANXA1             | JUND                  | COL4A1                 | LAMA2             |
|          | SOCS3                       | FOS               | JUN                   | THSD7A                 | P3H2              |
|          |                             | CFD               | IGFBP3                | FN1                    | COL21A1           |
|          |                             | GBP1              | ADAMTS1               | COL18A1                | CXCL12            |
|          |                             | SERPING1          | RARRES1               |                        | IL32              |
|          |                             | IRS2              | GAL                   |                        | ADAM12            |
|          |                             | ACTB              | HSPA1B                |                        | RHOB              |
|          |                             | HSP90AA1          | SOD2                  |                        | SPOCK1            |
|          |                             | NFKBIA            | HSPA1A                |                        | SPON1             |
|          |                             | NR4A1             | CST3                  |                        | PCDH18            |
|          |                             | JUN               | NAMPT                 |                        | LAMA3             |
|          |                             | MCL1              | CXCL12                |                        | MMP11             |
|          |                             | JUND              | IRS2                  |                        | LAMC1             |
|          |                             | TGM2              | IL15                  |                        | RND3              |
|          |                             | PLA2G2A           | MYC                   |                        |                   |
|          |                             | EGR1              | INSR                  |                        |                   |
|          |                             | SEC61G            | ID2                   |                        |                   |
|          |                             | SEC61B            | ATF3                  |                        |                   |
|          |                             | PSMA7             | ELN                   |                        |                   |
|          |                             |                   | CLK1                  |                        |                   |
|          |                             |                   | CYR61                 |                        |                   |
|          |                             |                   | STAT3                 |                        |                   |
|          |                             |                   | HGF                   |                        |                   |
|          |                             |                   | ZFP36L1               |                        |                   |
|          |                             |                   | CENPF                 |                        |                   |

MKI67  
PDGFRB  
MIS18BP1  
RAD21  
CNTRL  
ANLN  
CENPE  
CKAP5  
ASPM  
KNL1

---

**Table S4. Information for Figure 3E**

| N.O. | Age<br>(Years) | BMI   | Menstrual cycling        | Day of endometrial biopsy |
|------|----------------|-------|--------------------------|---------------------------|
| 53   | 30             | 22.95 | 6 days every 28 days     | 3th                       |
| 54   | 32             | 21.48 | 5 days every 30 days     | 2th                       |
| 56   | 30             | 20.69 | 7 days every 28 days     | 3th                       |
| 57   | 30             | 22.43 | 10 days every 35<br>days | 2th                       |
| 59   | 30             | 20.08 | 6 days every 28 days     | 2th                       |
| 60   | 31             | 22.83 | 6 days every 28 days     | 3th                       |
| 67   | 29             | 21.48 | 6 days every 28 days     | 10th                      |
| 68   | 30             | 22.43 | 6 days every 30 days     | 11th                      |
| 69   | 29             | 20.55 | 4 days every 28 days     | 10th                      |
| 70   | 37             | 21.48 | 7 days every 35 days     | 10th                      |
| 71   | 33             | 20.57 | 6 days every 28 days     | 10th                      |
| 72   | 34             | 26.03 | 6 days every 28 days     | 11th                      |
| 116  | 33             | 20.17 | 6 days every 28 days     | 22th                      |
| 117  | 31             | 27.64 | 5 days every 28 days     | 22th                      |
| 118  | 26             | 20.96 | 7 days every 28 days     | 23th                      |
| 120  | 32             | 21.51 | 6 days every 30 days     | 23th                      |
| 121  | 32             | 18.42 | 6 days every 28 days     | 21th                      |
| 123  | 27             | 19.72 | 6 days every 28 days     | 22th                      |

**Table S5. Information for Figure 5E**

| Group | N.O. | Age<br>(Years) | BMI   | Menstrual cycling    | Day of endometrial biopsy |
|-------|------|----------------|-------|----------------------|---------------------------|
| Ctrl  | 73   | 26             | 20.94 | 6 days every 28 days | 22th                      |
|       | 74   | 22             | 20.96 | 7 days every 28 days | 22th                      |
|       | 75   | 34             | 20.57 | 7 days every 28 days | 22th                      |
|       | 74   | 31             | 23.58 | 6 days every 30 days | 22th                      |
|       | 77   | 33             | 26.22 | 6 days every 28 days | 22th                      |
|       | 60   | 31             | 27.64 | 6 days every 28 days | 22th                      |
|       |      |                |       |                      |                           |
| RIF   | 1    | 29             | 21.34 | 6 days every 28 days | 22th                      |
|       | 2    | 44             | 19.23 | 4 days every 28 days | 22th                      |
|       | 3    | 31             | 21.48 | 7 days every 28 days | 22th                      |
|       | 4    | 32             | 19.33 | 5 days every 30 days | 22th                      |
|       | 5    | 33             | 21.51 | 6 days every 28 days | 22th                      |
|       | 6    | 32             | 23.92 | 6 days every 28 days | 22th                      |
|       |      |                |       |                      |                           |

## Figure legends

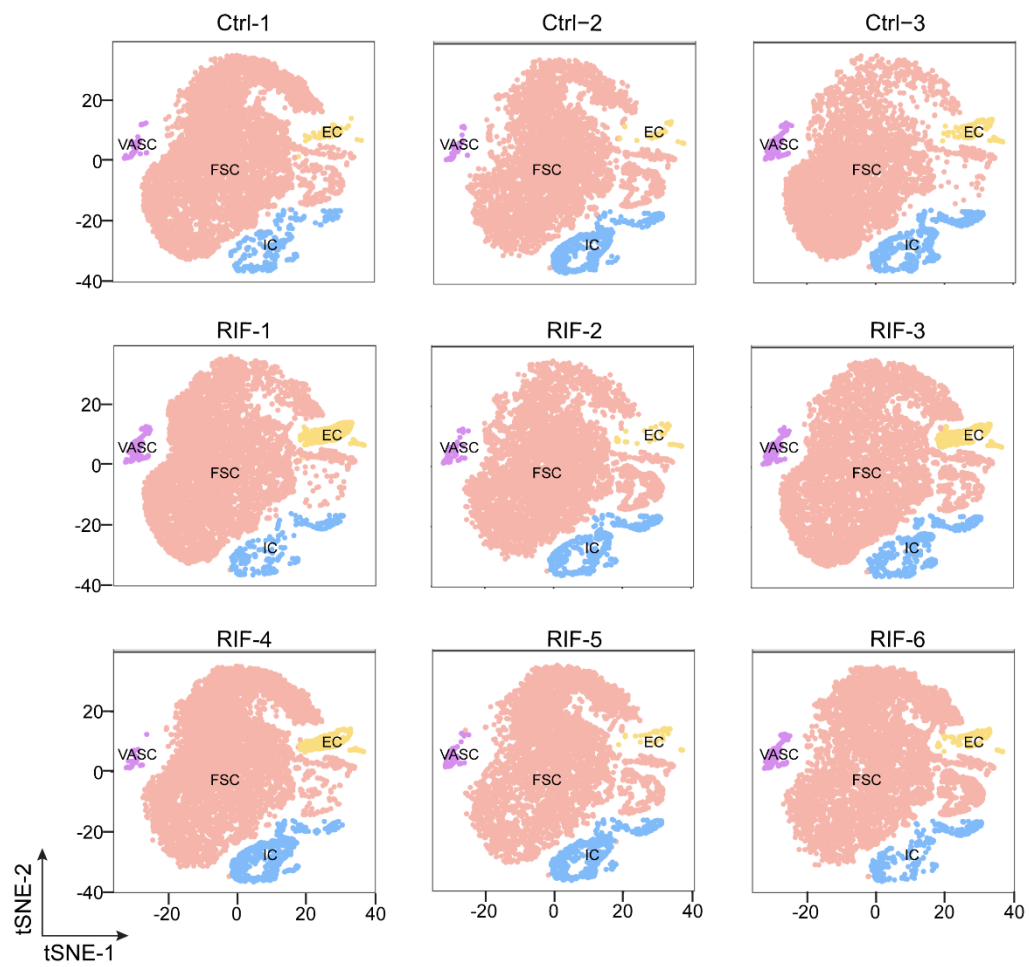

**Figure S1** *t*-SNE map showing the distribution of 4 subsets of cells in different endometrium samples (3 healthy control and 6 RIF patients).

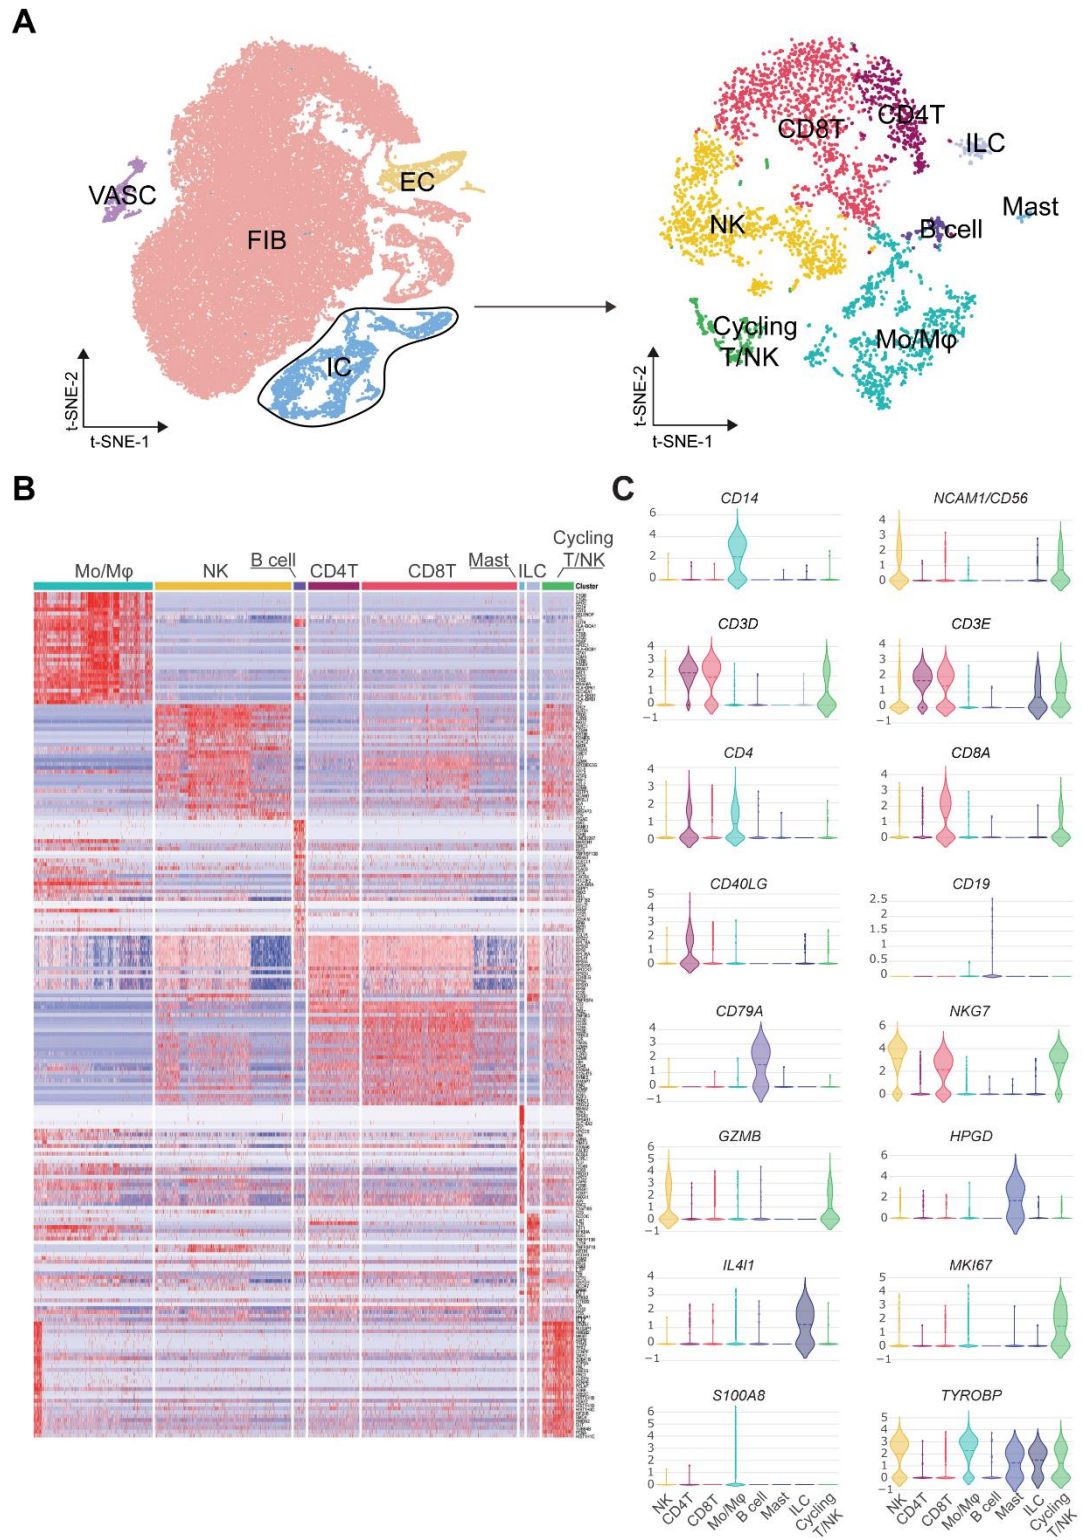

**Figure S2 Subtypes of endometrial immune cell subtypes.**

(A) t-SNE plots of IC cells (4790 cells), indicating eight main clusters.

(B, C) Heat map and violin plots showed the expression of differentially marker genes for each

cluster.

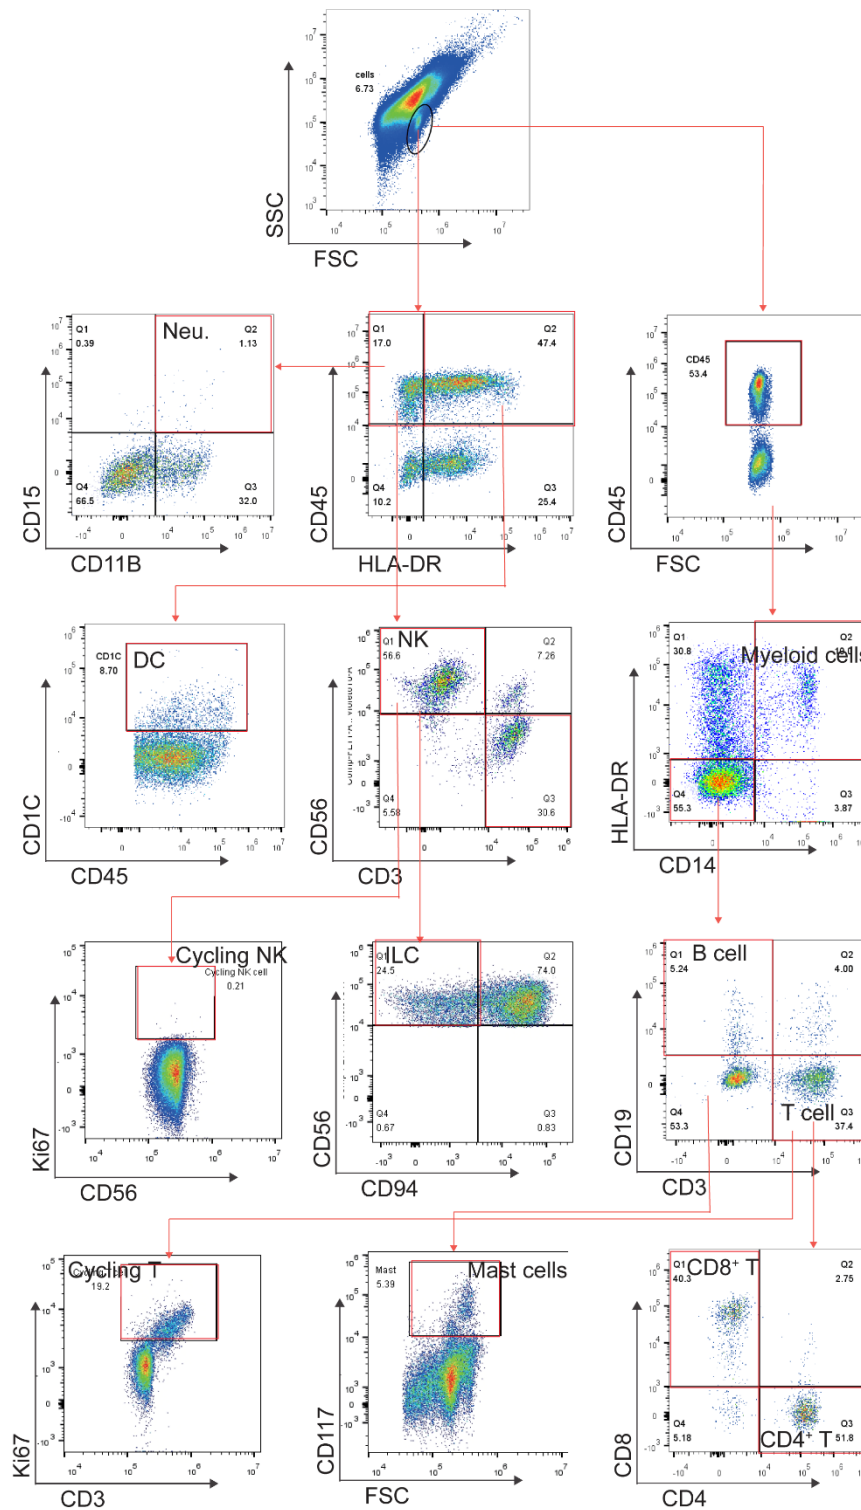

**Figure S3 Characteristics of endometrial immune cell subsets by FCM**

Gating strategy for a panel of 16 antibodies to analyze the different subsets of immune cells in endometrium from controls by flow cytometry.

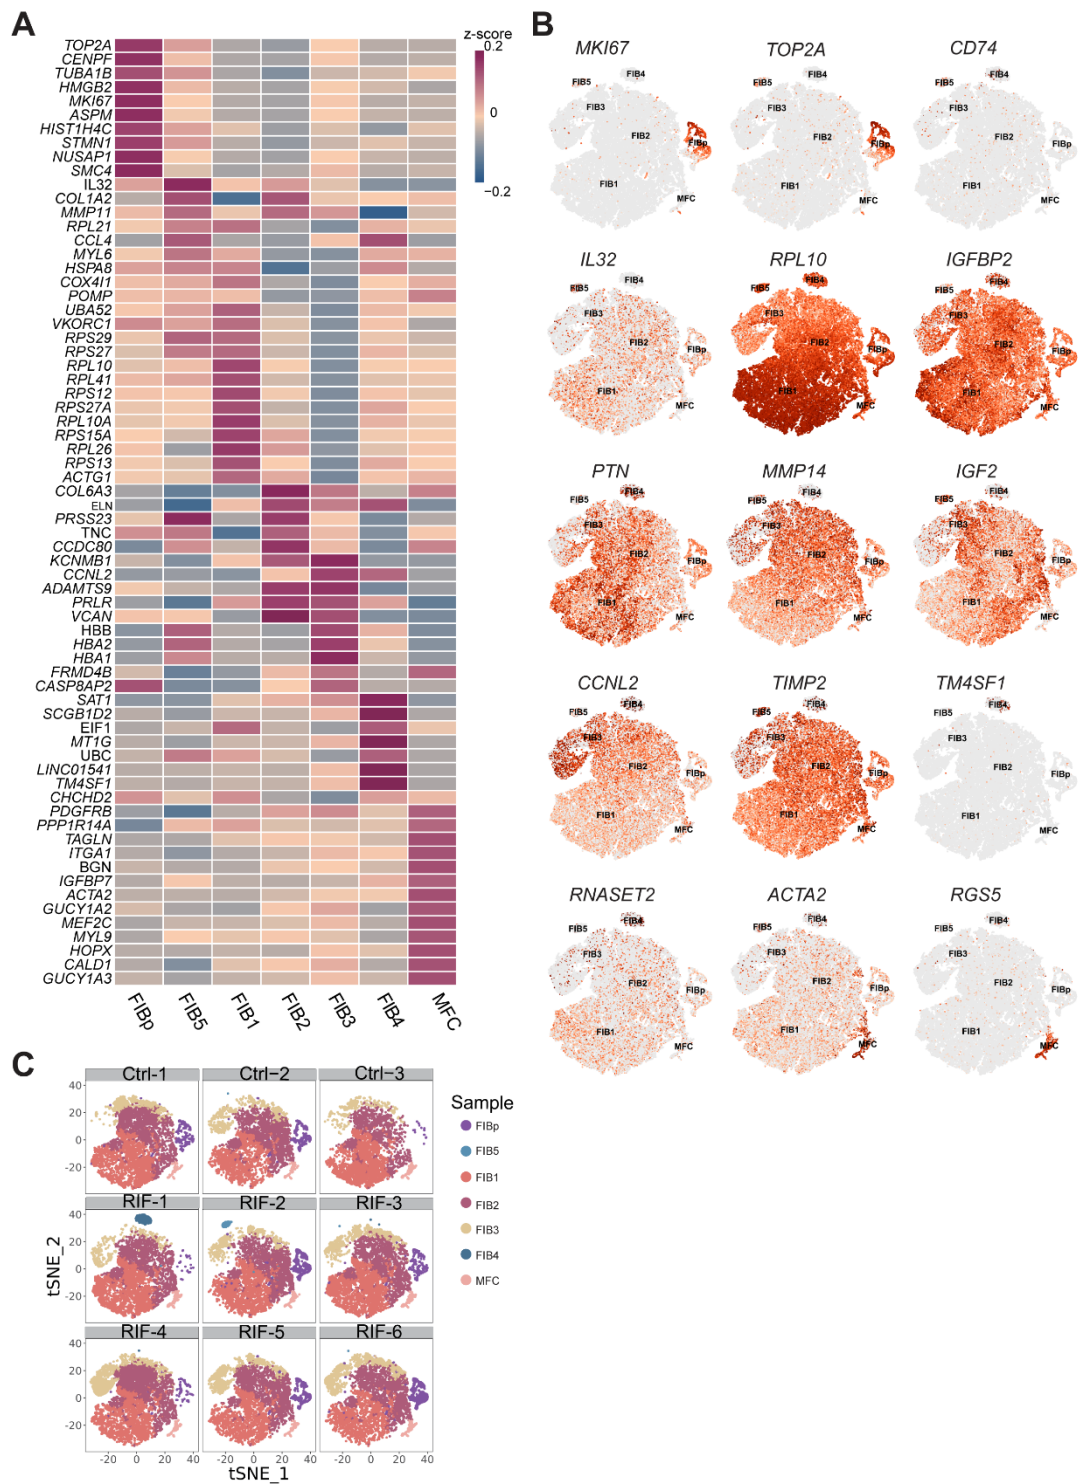

**Figure S4 The subtypes and proportion of endometrial FIB from controls and RIF patients**

(A) Heat map of relative expression (z-score) of selected maker genes for 7 sub-clusters of FIB

cells.

(B) Dot plots showing the expression of the indicated markers for each FIB cell cluster on the t-SNE map in Figure 2A.

(C) *t*-SNE map showing the distribution of 7 subsets of FIB in different endometrium samples (3 healthy control and 6 RIF patients).

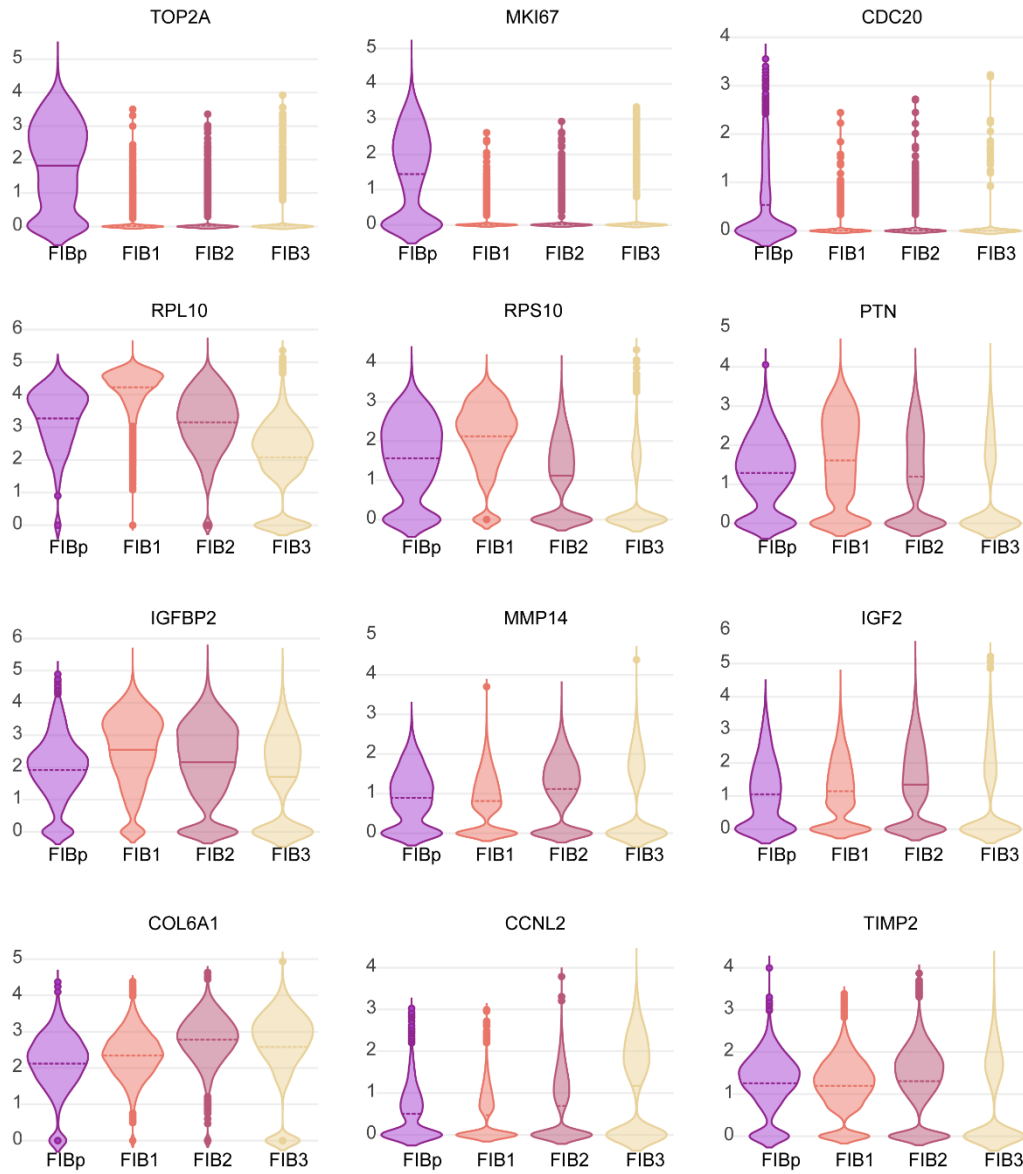

**Figure S5 The mark gene expression levels of 4 FIB subsets**

Violin plots showed the expression of differentially marker genes for each cluster.

**A**

| NO. |       | Term ID    | Term Name                                      | P-value  | (-log10P)   |
|-----|-------|------------|------------------------------------------------|----------|-------------|
| 1   | GO:MF | GO:0005102 | signaling receptor binding                     | 1.88E-04 | 3.725611204 |
| 2   | GO:MF | GO:0019838 | growth factor binding                          | 2.98E-03 | 2.525201181 |
| 3   | GO:MF | GO:0050840 | extracellular matrix binding                   | 6.46E-03 | 2.189700259 |
| 4   | GO:BP | GO:0007565 | female pregnancy                               | 2.00E-08 | 7.698535927 |
| 5   | GO:BP | GO:0042127 | regulation of cell population proliferation    | 1.87E-06 | 5.728855682 |
| 6   | GO:BP | GO:0035295 | tube development                               | 5.42E-06 | 5.266321344 |
| 7   | GO:BP | GO:0060135 | maternal process involved in female pregnancy  | 7.42E-06 | 5.129362037 |
| 8   | GO:BP | GO:0061458 | reproductive system development                | 1.05E-05 | 4.978397284 |
| 9   | GO:BP | GO:0000003 | reproduction                                   | 9.02E-05 | 4.044745317 |
| 10  | GO:BP | GO:0022414 | reproductive process                           | 8.84E-05 | 4.053695145 |
| 11  | GO:BP | GO:0046697 | decidualization                                | 4.17E-03 | 2.379968105 |
| 12  | GO:BP | GO:0003006 | developmental process involved in reproduction | 5.96E-03 | 2.224462365 |
| 13  | GO:BP | GO:0001893 | maternal placenta development                  | 1.04E-02 | 1.981715692 |
| 14  | GO:BP | GO:0001890 | placenta development                           | 2.44E-02 | 1.61225434  |
| 15  | GO:BP | GO:0007566 | embryo implantation                            | 4.36E-02 | 1.360712774 |
| 16  | GO:BP | GO:0048609 | multicellular organismal reproductive process  | 2.65E-02 | 1.577082019 |
| 17  | GO:BP | GO:0048608 | reproductive structure development             | 9.96E-06 | 5.001827878 |
| 18  | GO:BP | GO:0009725 | response to hormone                            | 4.43E-03 | 2.354086725 |
| 19  | GO:BP | GO:0032355 | response to estradiol                          | 2.19E-02 | 1.659555885 |
| 20  | GO:CC | GO:0062023 | collagen-containing extracellular matrix       | 4.39E-04 | 3.35753548  |

**B**

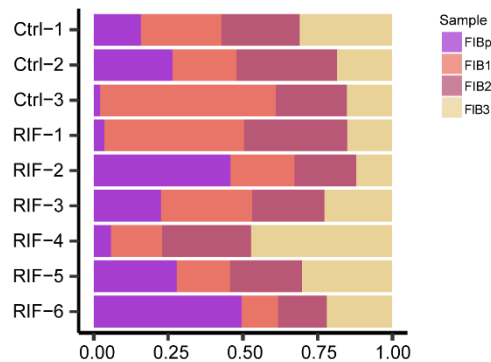

**Figure S6 The marked GO terms and the proportions of 4 FIB subtypes**

(A) The marked GO terms for Figure 2C, was gotten from g:Profile

(<https://biit.cs.ut.ee/gprofiler/>).

(B) The distribution of 4 subsets of FIB in different endometrium samples (3 healthy control and 6 RIF patients).

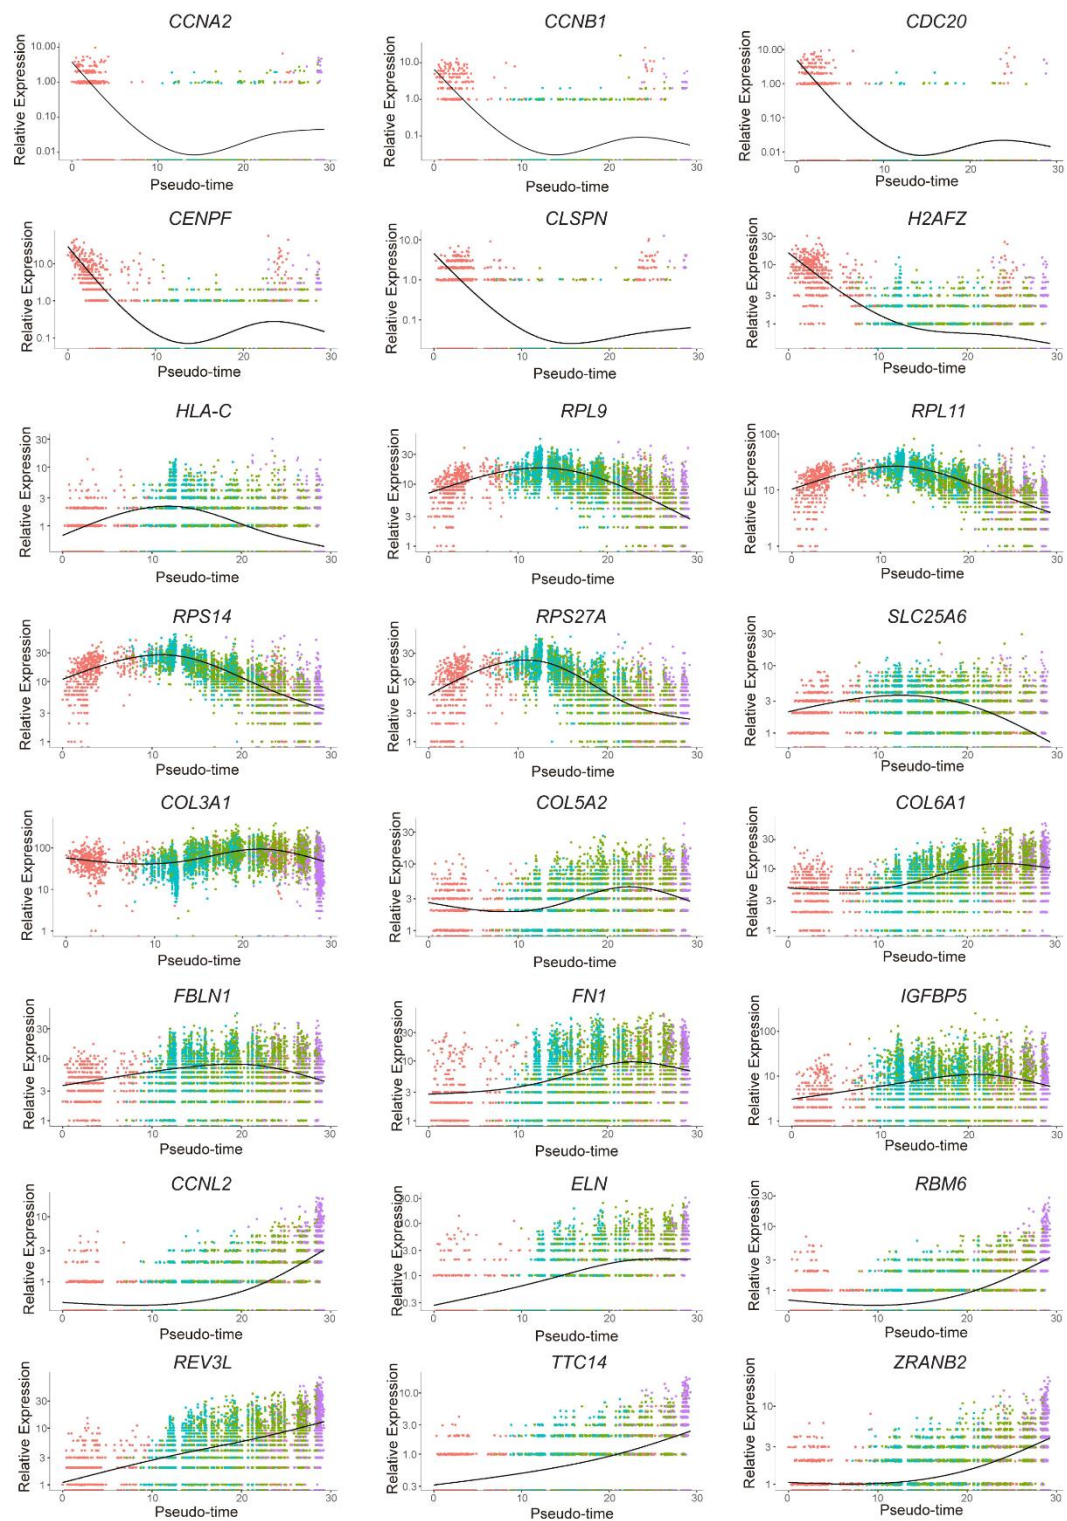

**Figure S7 Expression patterns of representative genes in four ESCs along the reprogramming trajectory.**

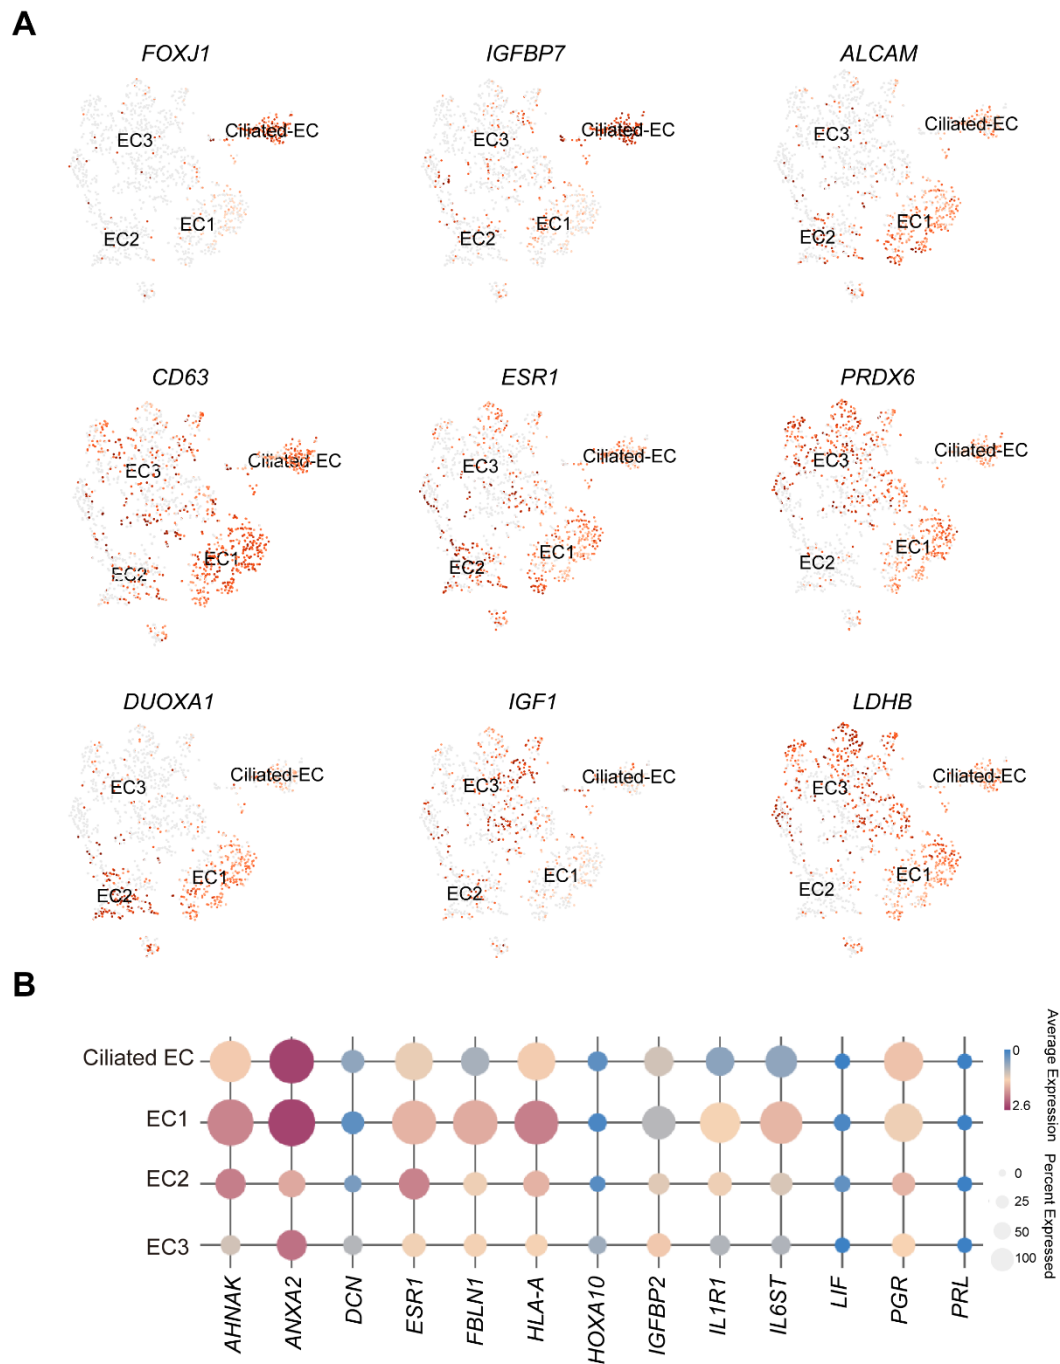

**Figure S8 Characteristics of four sub-clusters of EC.**

(A) Gene expression levels of marker genes across four sub-clusters of EC.

(B) Bubble diagram showing average expression of endometrial receptivity-genes for 4 sub-

clusters of EC.

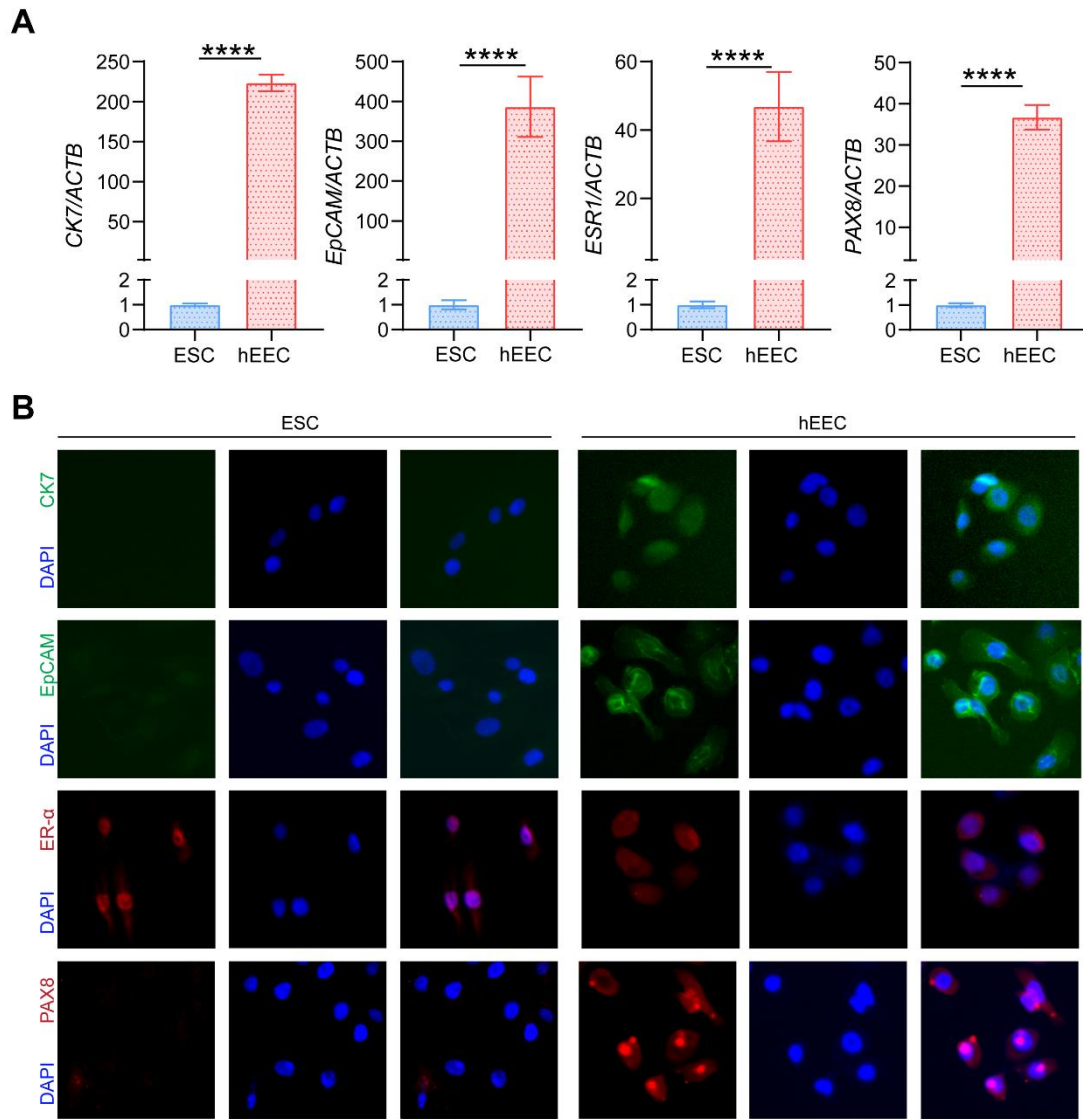

**Figure S9 Characterization of the human endometrial epithelial hEEC cell line.**

(A) The mRNA expression levels of *CK7*, *EpCAM*, *ESR1*, and *PAX8* were detected by RT-PCR, which were measured in hEECs and primary ESCs (n = 3). Data were presented as mean ± SEM and analyzed by t test. (\*\*\*\*,  $p < 0.0001$ )

**(B)** Immunofluorescent staining of CK7, EpCAM, ER- $\alpha$ , and PAX8 on hEECs and primary ESCs (n = 3).

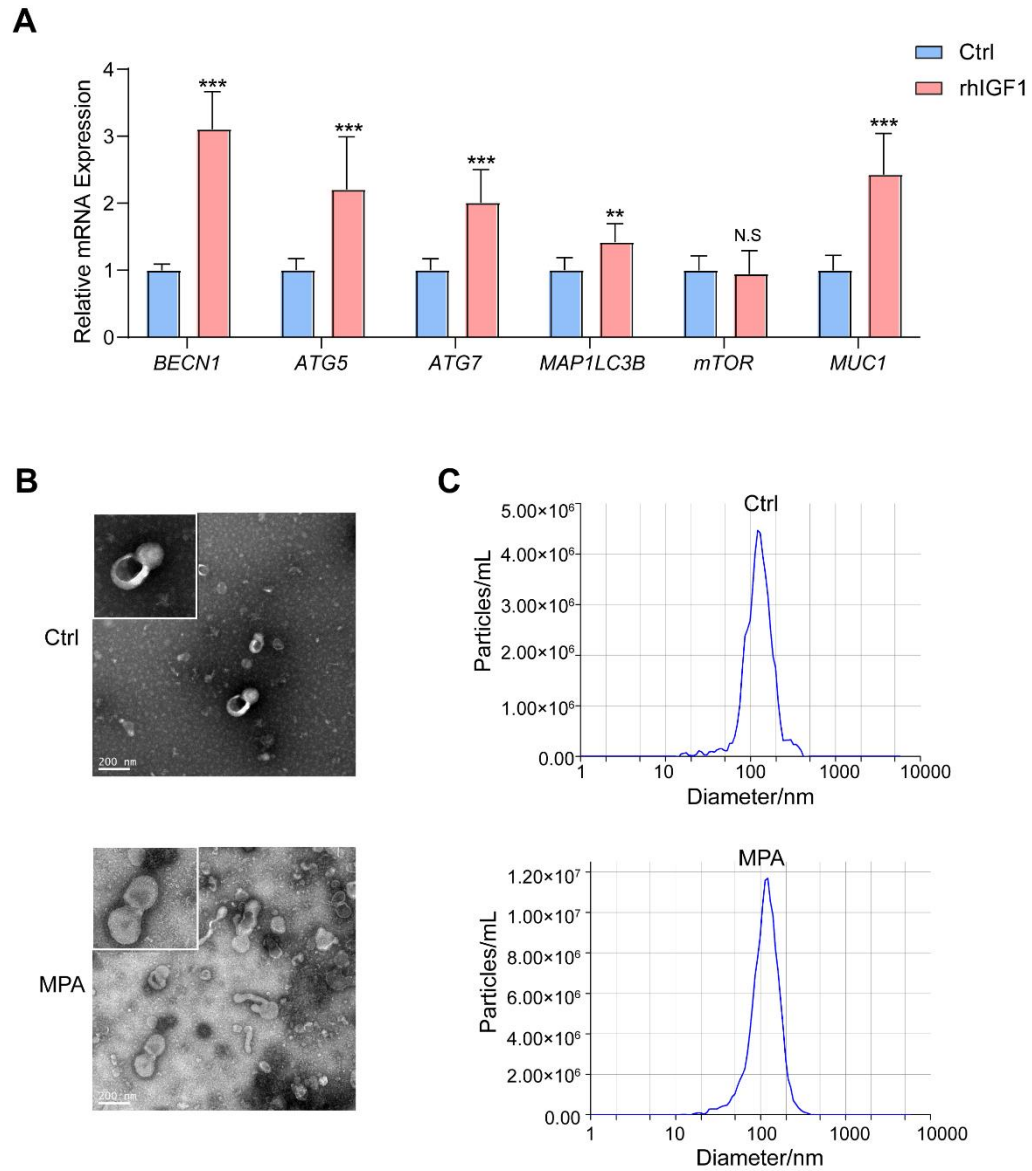

**Figure S10 Progesterone increases exosomes production by EEC.**

(A) HEECs were treated with rhIGF1 (2 ng/mL) or control vehicle (n = 3) for 48 h, and the mRNA expression levels of *BECN1*, *ATG5*, *ATG7*, *MAP1LC3B*, *mTOR*, and *MUC1* were

detected by RT-PCR. Data were presented as mean  $\pm$  SEM and analyzed by t test. (NS, no significance, \*\*,  $p < 0.01$ , \*\*\*,  $p < 0.001$ )

(B) Representative transmission electron microscopy (TEM) analysis from exosomes enriched from 0.1% DMEM-treated or 1  $\mu$ M MPA-treated EECs. Scale bar, 200 nm.

(C) Nanoparticle tracking analysis (NTA) from enriched exosomes (0.1% DMEM-treated or 1  $\mu$ M MPA-treated EECs) depicting size distribution patterns.

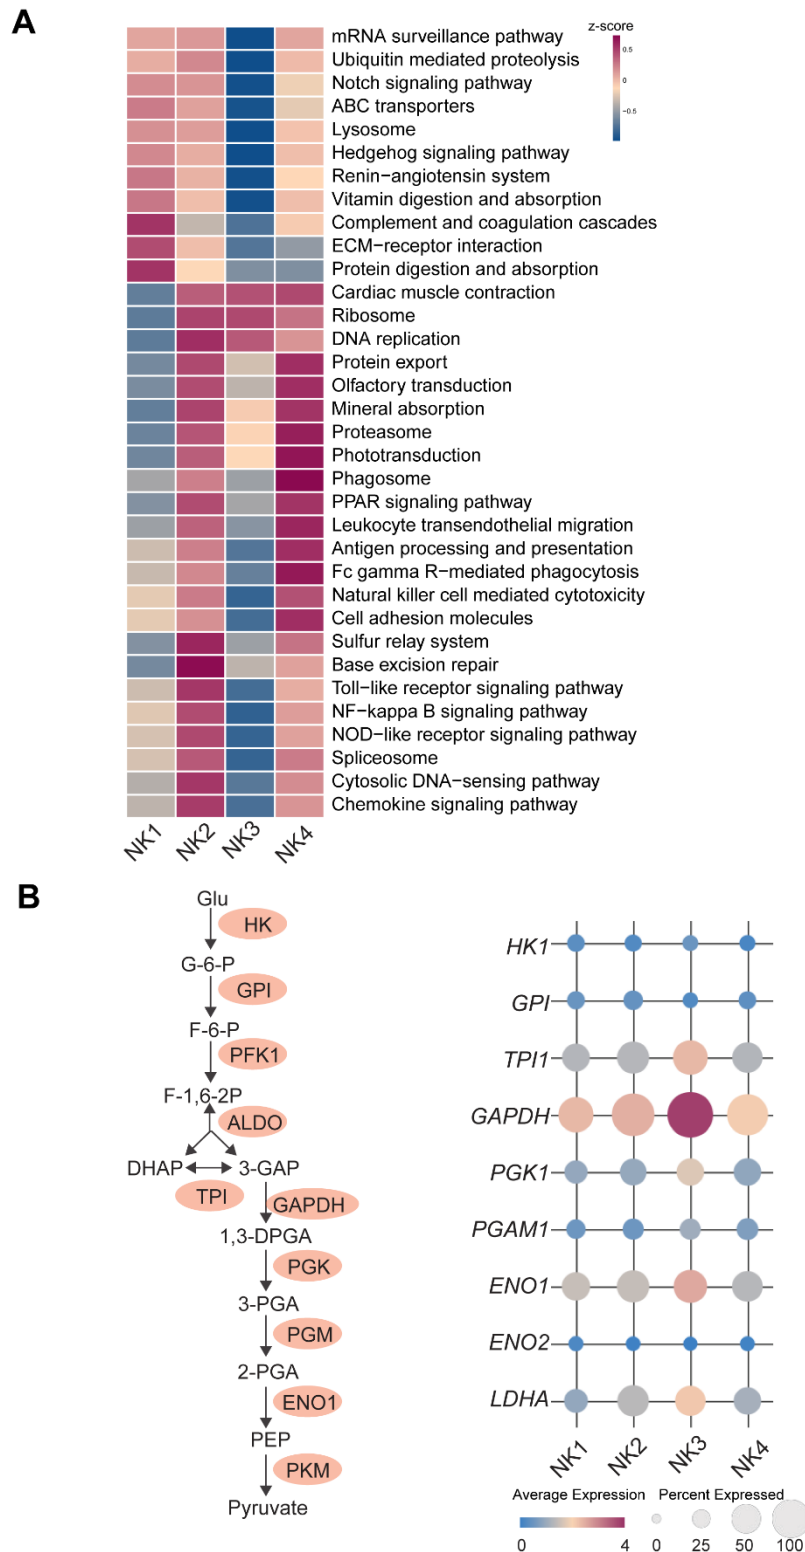

**Figure S11 Characteristics of four NK subtypes.**

(A) QuSAQE analysis of functional pathway in four sub-clusters of endometrial NK cells.

(B) Bubble diagram showing the expression of glycolysis-related genes in endometrial NK1,

NK2, NK3, and NK4 cells.

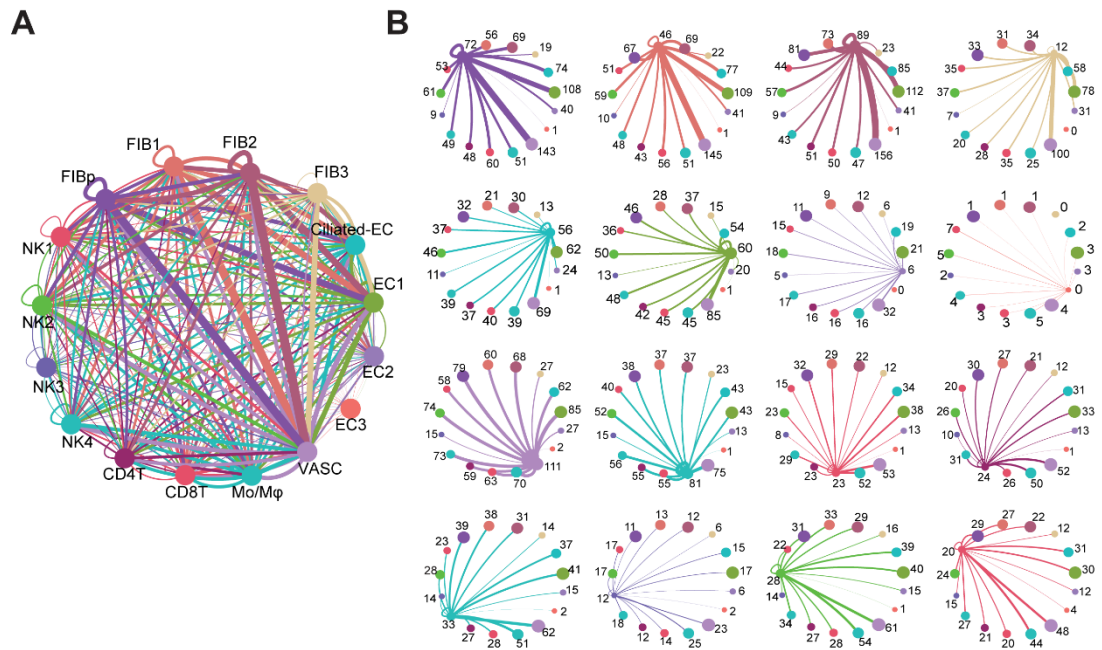

**Figure S12 Intercellular communication analysis among all cell types in endometrium.**

(A) Intercellular communication analysis among all cell types in endometrium. Line color indicates ligands broadcast by the cell population of the same color (labeled). Lines connect to

cell populations where cognate receptors are expressed. Line thickness is proportional to the number of ligands where cognate receptors are present in the recipient cell population. Loops indicate autocrine circuits. Map quantifies potential communication but does not account for anatomic position or boundaries of cell populations.

(B) Detailed view of ligands broadcast by each cell type and those populations expressing cognate receptors primed to receive a signal. Numbers indicate the quantity of ligand-receptor pairs for each inter-population link. Colors of the cell population corresponds to (A) above.

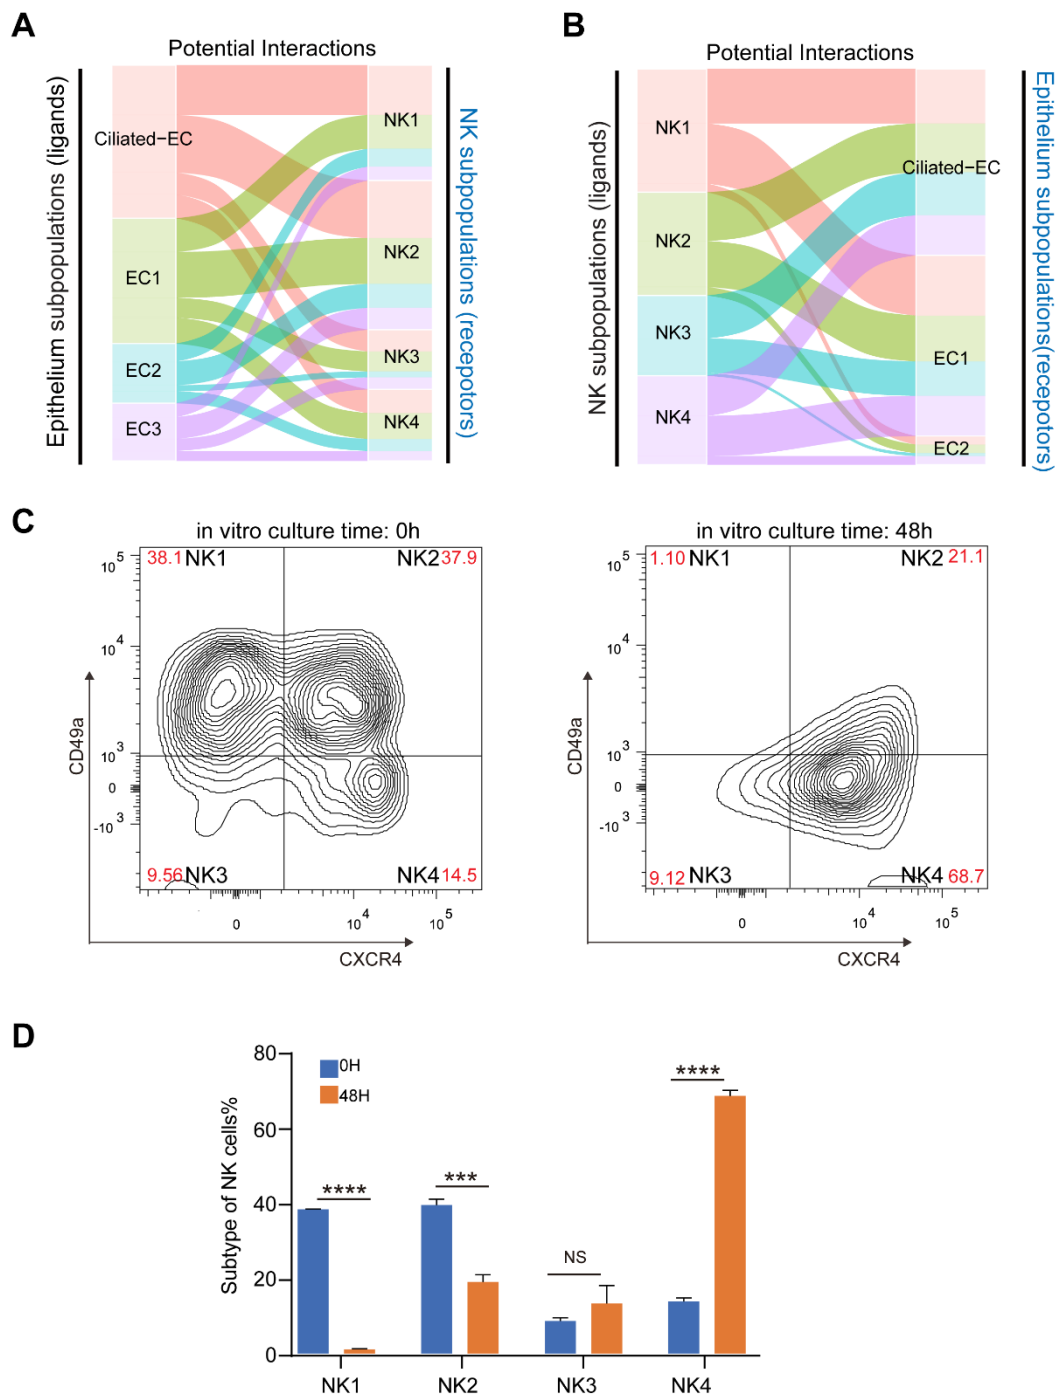

**Figure S13 The potential interactions between endometrial EC and NK cells. And the proportion of four sub-clusters of NK after 48 hours *in vitro* culture.**

(A, B) Potential interactions between four subpopulations of EC and NK cells based on

receptor-ligand pairs. The width of the line represented the number of receptor-ligand pairs.

(C, D) FCM was used to determine the proportions of four groups of NK cells from control group during secretory phase ( $n = 6$  for each group) after 0- or 48-hours in vitro culture. Cells were initially gated within  $CD45^+CD3^-CD56^+$  gate, and then CXCR4 and ITGA1 gating. Data were presented as mean  $\pm$  SEM and analyzed by t test. (NS, no significance, \*\*\*\*,  $p < 0.0001$ )
